# Supplementary material
Source: PubMed Central journal article supplement (PMC3128125)

## Supporting information for

### Akt-dependent anabolic activity of natural and synthetic brassinosteroids in rat skeletal muscle cells

*Debora Esposito, Thirumurugan Rathinasabapathy, Alexander Poulev, Slavko Komarnytsky<sup>\*†</sup>, and Ilya Raskin*

Biotech Center, SEBS, Rutgers University, 59 Dudley Rd, New Brunswick, New Jersey 08901

<sup>†</sup> **Current address:** Plants for Human Health Institute, FBNS, North Carolina State University, 600 Laureate Way, Kannapolis, NC 28081

**\* Corresponding author:** Tel +1 (704) 250-5459; Fax +1 (704) 250-5409; Email

[komarnytsky@ncsu.edu](mailto:komarnytsky@ncsu.edu)

#### Contents

**Supporting Figure 1.** Synthesis of (22S, 23S, 24S)-2 $\alpha$ , 3 $\alpha$ , 22, 23-tetrahydroxy-24-ethyl-5 $\alpha$ -cholestan-6-one (2) from stigmasterol.

**Supporting Figure 2.** Synthesis of (22S, 23S, 24S)-3 $\alpha$ -fluoro- 22, 23-dihydroxy-24-ethyl-5 $\alpha$ -cholestan-6-one and (22S, 23S, 24S)-3 $\alpha$ -fluoro- 22, 23-dihydroxy-7-oxo-24-ethyl-5 $\alpha$ -cholestan-6-one.

**Supporting Figure 3.** Synthesis of (22S, 23S, 24S)-2 $\alpha$ ,3 $\alpha$ ,22, 23-tetraacetoxy-24-ethyl-B-homo-6-aza-5 $\alpha$ -cholestan-6-one.

**Supporting Figure 4.** Synthesis of (22S, 23S, 24S)-2 $\alpha$ ,3 $\alpha$ ,22,23-tetrahydroxy-24-ethyl-B-homo-7-aza-5 $\alpha$ -cholestan-6-one.

**Supporting Figure 1.** Synthesis of (22S, 23S, 24S)-2 $\alpha$ , 3 $\alpha$ , 22, 23-tetrahydroxy-24-ethyl-5 $\alpha$ -cholestan-6-one (2) from stigmasterol.

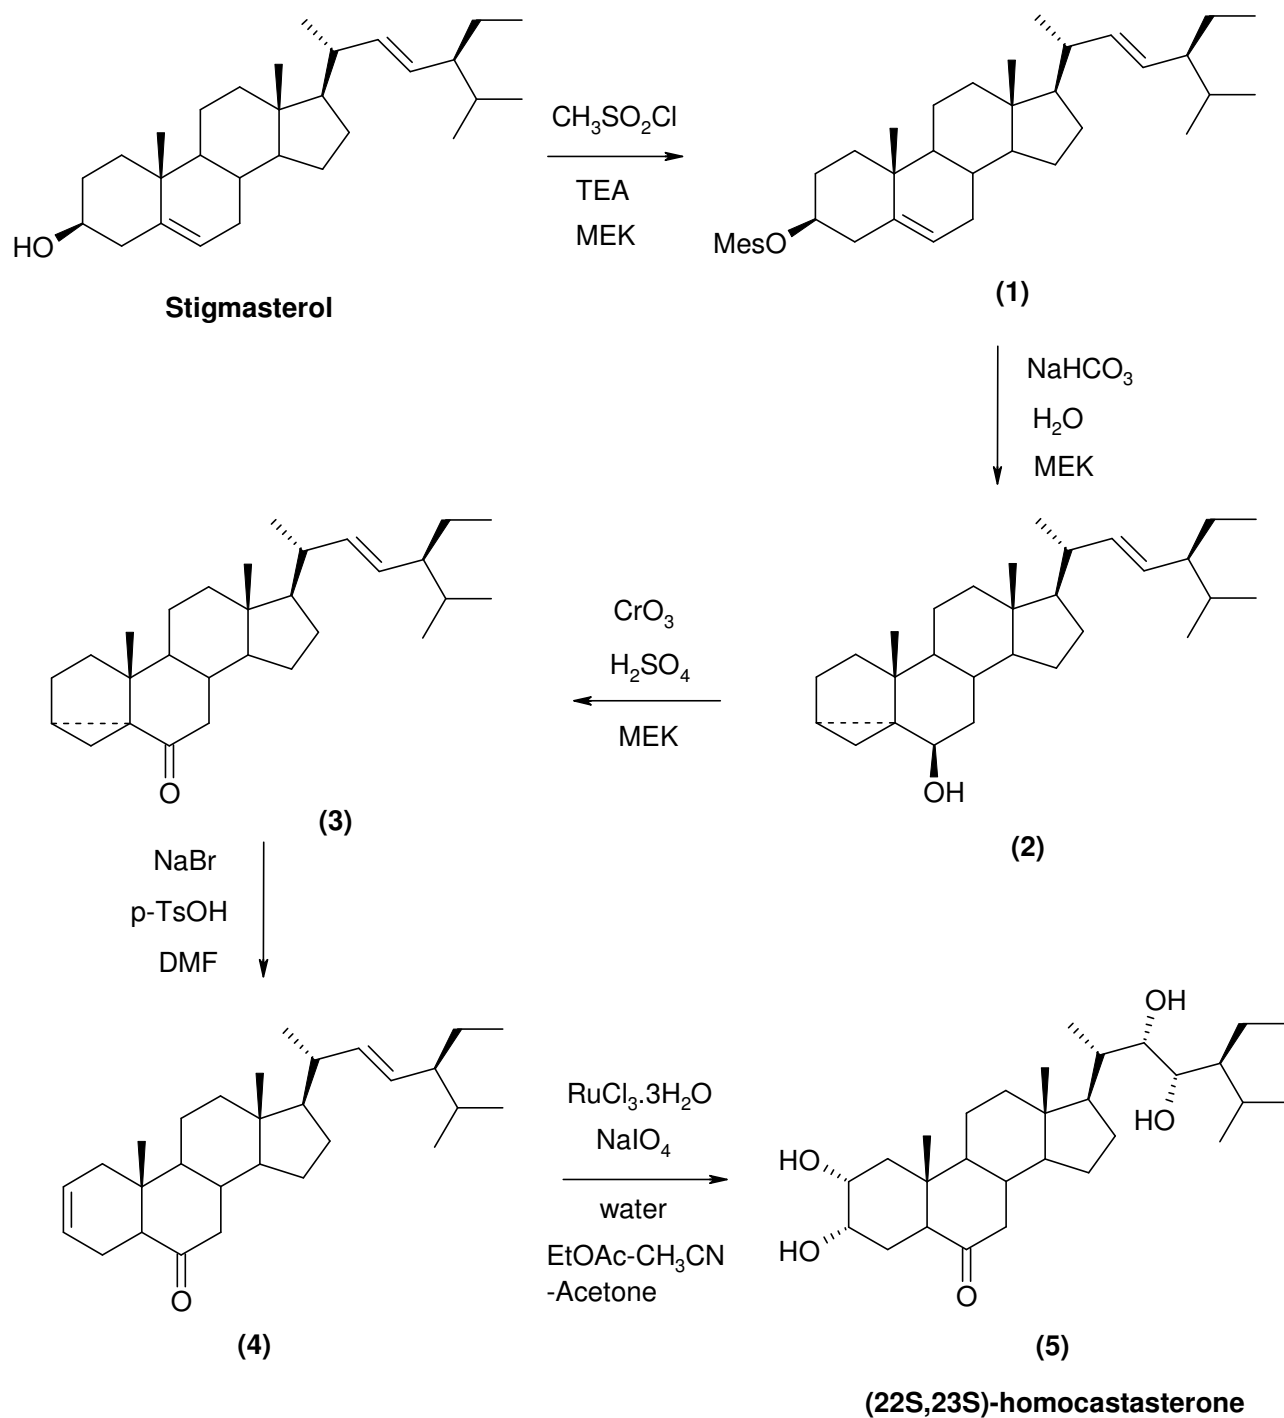

**Supporting Figure 2.** Synthesis of (22S, 23S, 24S)-3 $\alpha$ -fluoro- 22, 23-dihydroxy-24-ethyl-5 $\alpha$ -cholestan-6-one and (22S, 23S, 24S)-3 $\alpha$ -fluoro- 22, 23-dihydroxy-7-oxo-24-ethyl-5 $\alpha$ -cholestan-6-one.

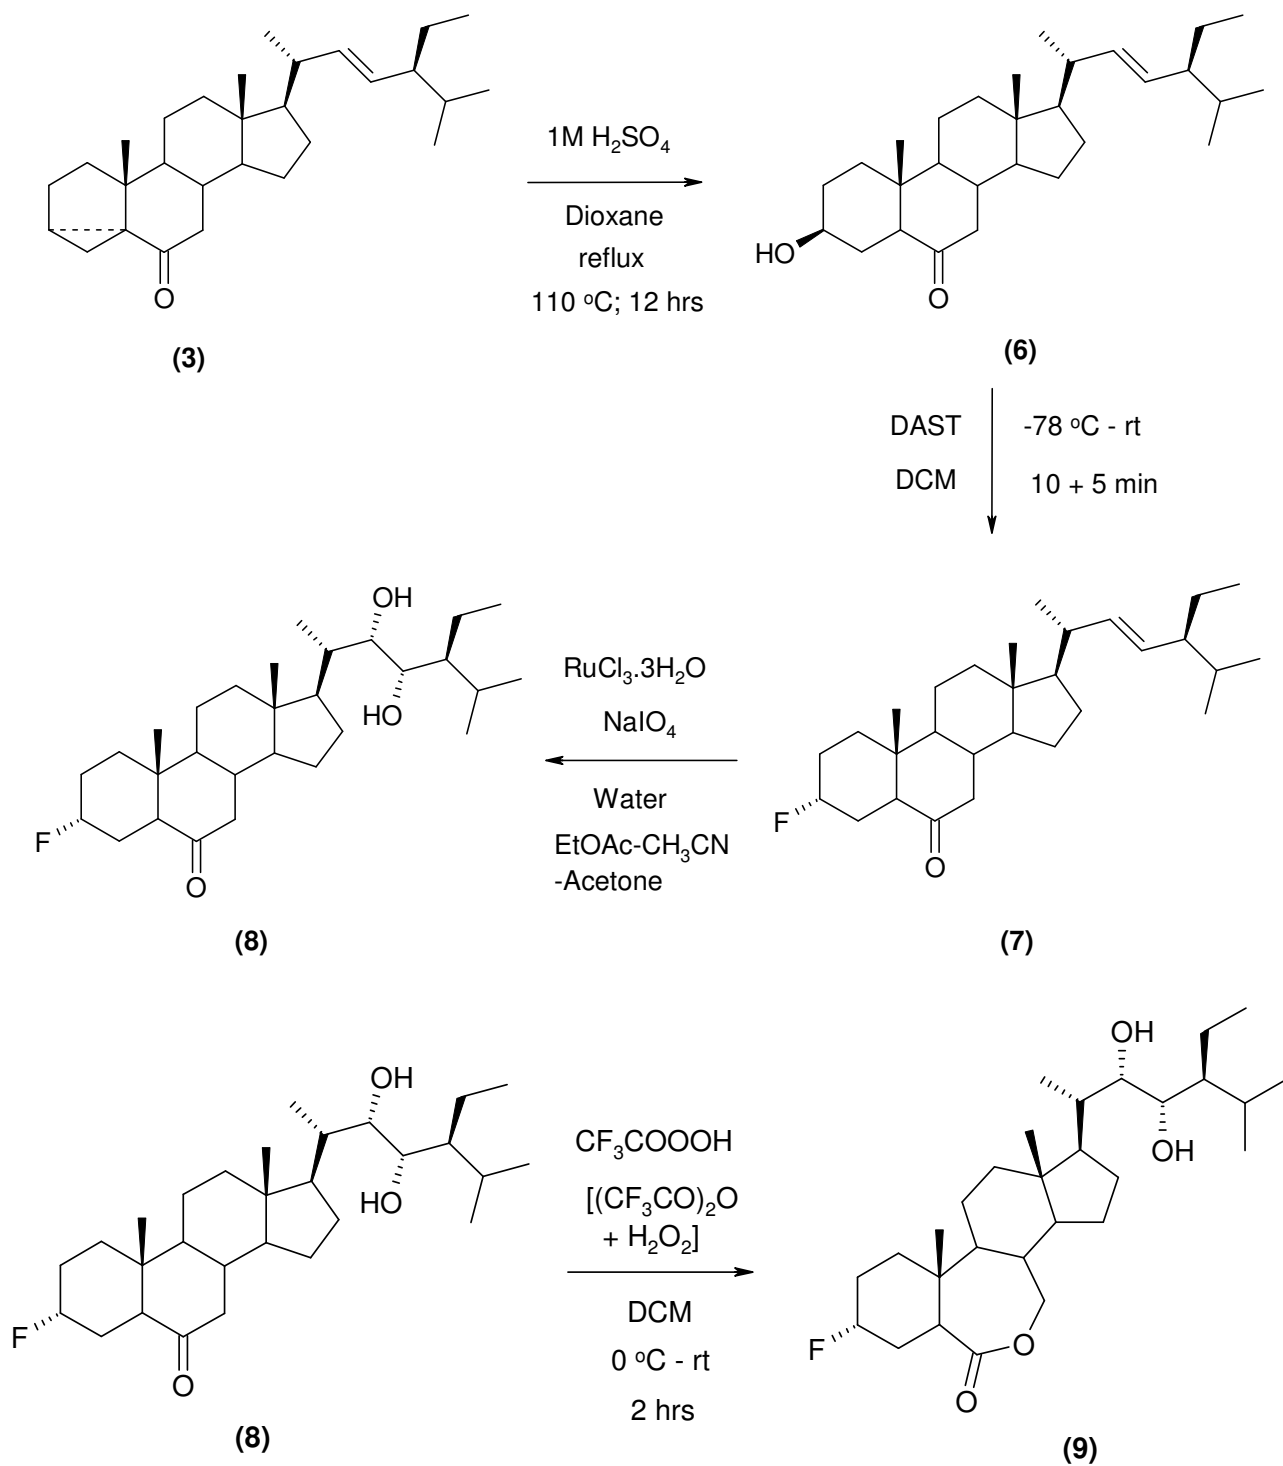

**Supporting Figure 3.** Synthesis of (22S, 23S, 24S)-2 $\alpha$ ,3 $\alpha$ ,22, 23-tetraacetoxy-24-ethyl-B-homo-6-aza-5 $\alpha$ -cholestan-6-one.

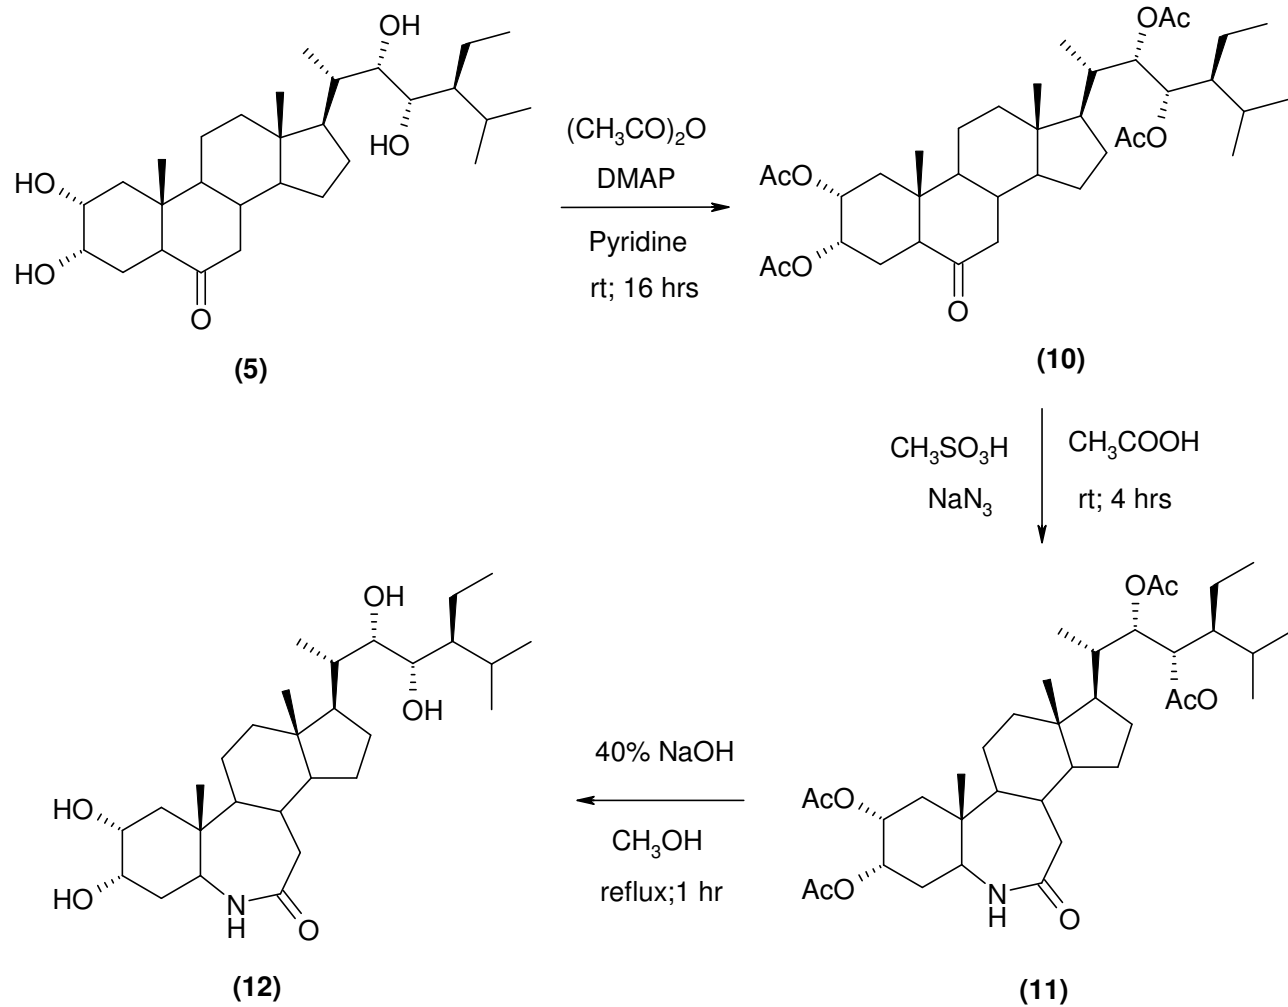

**Supporting Figure 4.** Synthesis of (22S, 23S, 24S)-2 $\alpha$ ,3 $\alpha$ ,22,23-tetrahydroxy-24-ethyl-B-homo-7-aza-5 $\alpha$ -cholestan-6-one.

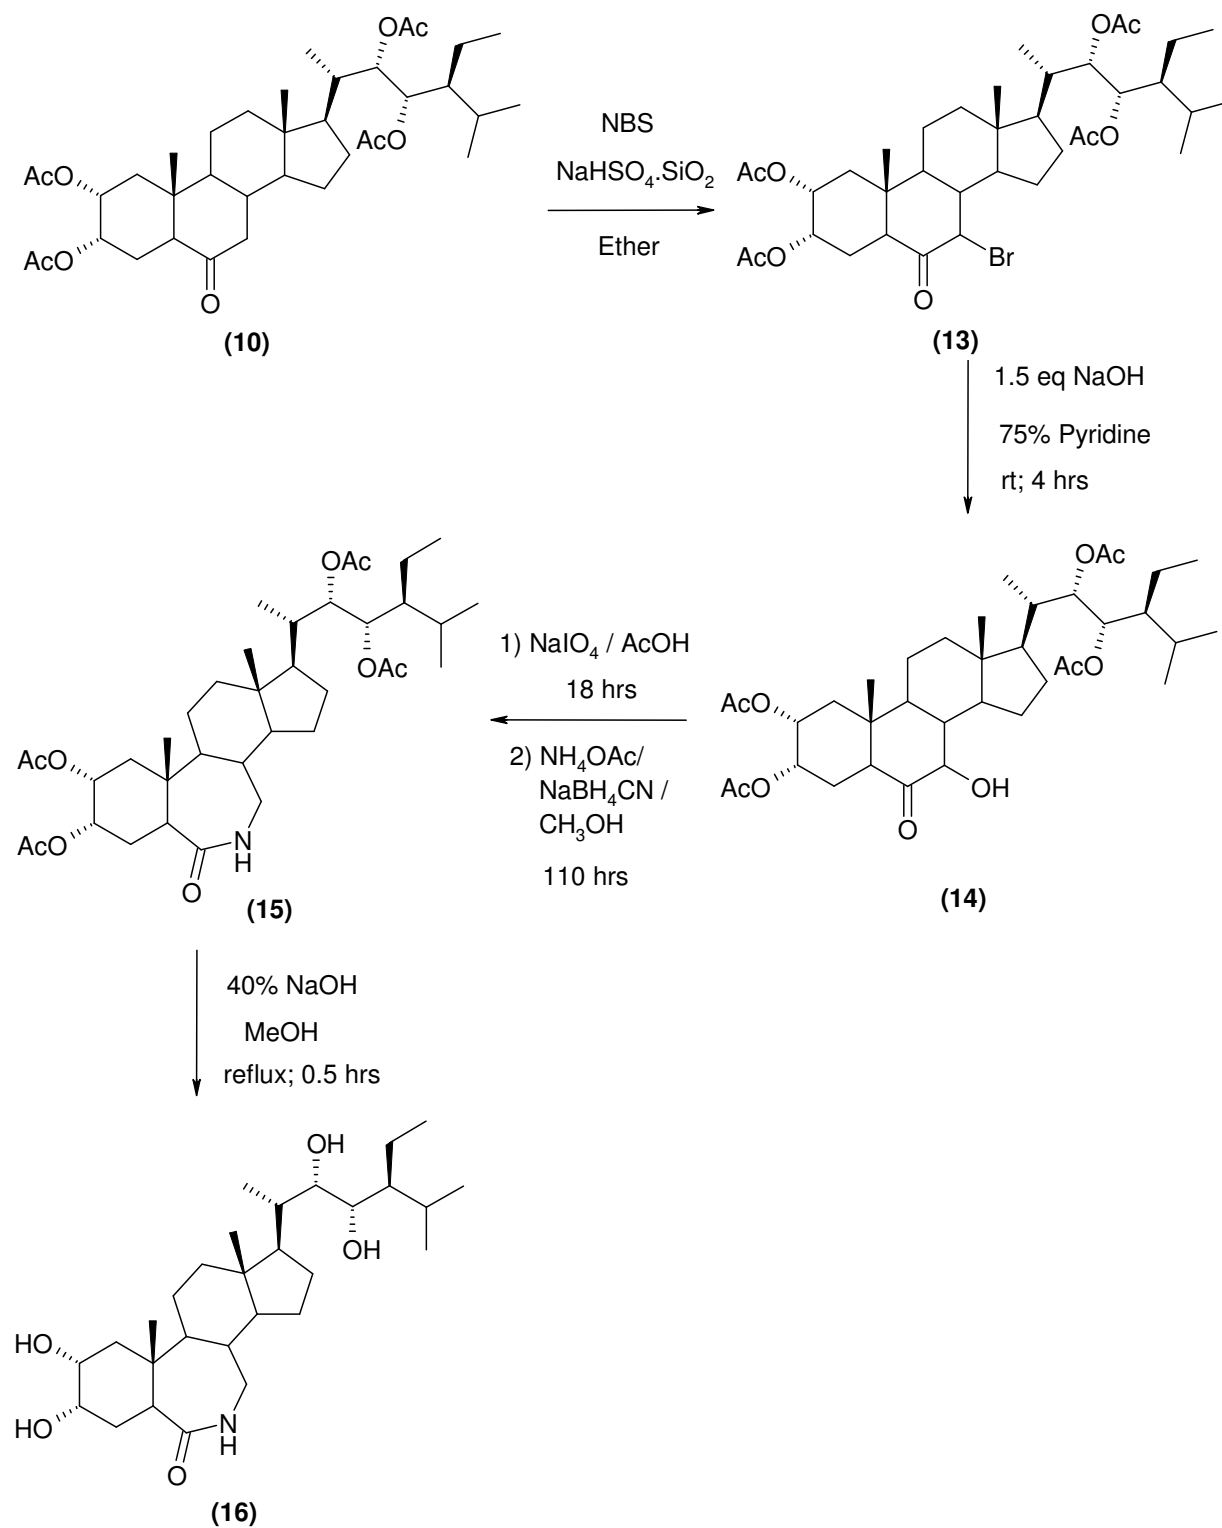

Supplement: NIHMS299886-supplement-1_si_001.pdf [file NIHMS299886-supplement-1_si_001.pdf]
